# Supplementary material for: Vitamin B6 Metabolism Determines T Cell Anti-Tumor Responses
Source: PubMed Central journal article supplement (PMC8891565; doi:10.3389/fimmu.2022.837669), 2022-02-17
Supplement: DataSheet_1.pdf [file DataSheet_1.pdf]

**Supplementary Data 1 Solute carrier (Slc) transporter genes (manual curation)**

|                       |                          |          |          |                         |
|-----------------------|--------------------------|----------|----------|-------------------------|
| Slc10a1               | Slc16a5                  | Slc22a2  | Slc25a22 | Slc26a6                 |
| Slc10a2               | Slc16a6                  | Slc22a20 | Slc25a23 | Slc26a7                 |
| Slc10a3               | Slc16a7                  | Slc22a21 | Slc25a24 | Slc26a8                 |
| Slc10a4               | Slc16a8                  | Slc22a22 | Slc25a25 | Slc26a9                 |
| Slc10a5               | Slc16a9                  | Slc22a23 | Slc25a26 | Slc27a1                 |
| Slc10a6               | Slc17a1                  | Slc22a26 | Slc25a27 | Slc27a2                 |
| Slc10a7               | Slc17a2                  | Slc22a27 | Slc25a28 | Slc27a3                 |
| Slc11a1               | Slc17a3                  | Slc22a28 | Slc25a29 | Slc27a4                 |
| Slc11a2               | Slc17a4                  | Slc22a29 | Slc25a3  | Slc27a5                 |
| Slc12a1               | Slc17a5                  | Slc22a3  | Slc25a30 | Slc27a6                 |
| Slc12a2               | Slc17a6                  | Slc22a30 | Slc25a31 | Slc28a1                 |
| Slc12a3               | Slc17a7                  | Slc22a4  | Slc25a32 | Slc28a2                 |
| Slc12a4               | Slc17a8                  | Slc22a5  | Slc25a33 | Slc28a3                 |
| Slc12a5               | Slc17a9                  | Slc22a6  | Slc25a34 | Slc29a1                 |
| Slc12a6               | Slc18a1                  | Slc22a7  | Slc25a35 | Slc29a2                 |
| Slc12a7               | Slc18a2                  | Slc22a8  | Slc25a36 | Slc29a3                 |
| Slc12a8               | Slc18a3                  | Slc23a1  | Slc25a37 | Slc29a4                 |
| Slc12a9               | Slc18b1                  | Slc23a2  | Slc25a38 | Slc2a1                  |
| Slc13a1               | Slc19a1                  | Slc23a3  | Slc25a39 | Slc2a10                 |
| Slc13a2               | Slc19a2                  | Slc23a4  | Slc25a4  | Slc2a12                 |
| Slc13a2 <sub>os</sub> | Slc19a3                  | Slc24a1  | Slc25a40 | Slc2a13                 |
| Slc13a3               | Slc1a1                   | Slc24a2  | Slc25a41 | Slc2a2                  |
| Slc13a4               | Slc1a2                   | Slc24a3  | Slc25a42 | Slc2a3                  |
| Slc13a5               | Slc1a3                   | Slc24a4  | Slc25a43 | Slc2a4                  |
| Slc14a1               | Slc1a4                   | Slc24a5  | Slc25a44 | Slc2a4 <sub>rg-ps</sub> |
| Slc14a2               | Slc1a5                   | Slc24a6  | Slc25a45 | Slc2a5                  |
| Slc15a1               | Slc1a6                   | Slc25a1  | Slc25a46 | Slc2a6                  |
| Slc15a2               | Slc1a7                   | Slc25a10 | Slc25a47 | Slc2a7                  |
| Slc15a3               | Slc20a1                  | Slc25a11 | Slc25a48 | Slc2a8                  |
| Slc15a4               | Slc20a2                  | Slc25a12 | Slc25a5  | Slc2a9                  |
| Slc15a5               | Slc22a1                  | Slc25a13 | Slc25a51 | Slc30a1                 |
| Slc16a1               | Slc22a12                 | Slc25a14 | Slc25a53 | Slc30a10                |
| Slc16a10              | Slc22a13                 | Slc25a15 | Slc25a54 | Slc30a2                 |
| Slc16a11              | Slc22a13 <sub>b-ps</sub> | Slc25a16 | Slc26a1  | Slc30a3                 |
| Slc16a12              | Slc22a14                 | Slc25a17 | Slc26a10 | Slc30a4                 |
| Slc16a13              | Slc22a15                 | Slc25a18 | Slc26a11 | Slc30a5                 |
| Slc16a14              | Slc22a16                 | Slc25a19 | Slc26a2  | Slc30a6                 |
| Slc16a2               | Slc22a17                 | Slc25a2  | Slc26a3  | Slc30a7                 |
| Slc16a3               | Slc22a18                 | Slc25a20 | Slc26a4  | Slc30a8                 |
| Slc16a4               | Slc22a19                 | Slc25a21 | Slc26a5  | Slc30a9                 |

|           |            |          |           |          |
|-----------|------------|----------|-----------|----------|
| Slc31a1   | Slc37a2    | Slc44a3  | Slc5a7    | Slc7a9   |
| Slc31a2   | Slc37a3    | Slc44a4  | Slc5a8    | Slc8a1   |
| Slc32a1   | Slc37a4    | Slc44a5  | Slc5a9    | Slc8a2   |
| Slc33a1   | Slc38a1    | Slc45a1  | Slc6a1    | Slc8a3   |
| Slc34a1   | Slc38a10   | Slc45a2  | Slc6a11   | Slc8b1   |
| Slc34a2   | Slc38a11   | Slc45a3  | Slc6a12   | Slc9a1   |
| Slc34a3   | Slc38a2    | Slc45a4  | Slc6a13   | Slc9a2   |
| Slc35a1   | Slc38a3    | Slc46a1  | Slc6a14   | Slc9a3   |
| Slc35a2   | Slc38a4    | Slc46a2  | Slc6a15   | Slc9a3r1 |
| Slc35a3   | Slc38a5    | Slc46a3  | Slc6a16   | Slc9a3r2 |
| Slc35a4   | Slc38a6    | Slc47a1  | Slc6a17   | Slc9a4   |
| Slc35a5   | Slc38a7    | Slc47a2  | Slc6a18   | Slc9a5   |
| Slc35b1   | Slc38a8    | Slc48a1  | Slc6a19   | Slc9a6   |
| Slc35b2   | Slc38a9    | Slc49a4  | Slc6a19os | Slc9a7   |
| Slc35b3   | Slc39a1    | Slc4a1   | Slc6a2    | Slc9a8   |
| Slc35b4   | Slc39a1-ps | Slc4a10  | Slc6a20a  | Slc9a9   |
| Slc35c1   | Slc39a10   | Slc4a11  | Slc6a20b  | Slc9b1   |
| Slc35c2   | Slc39a11   | Slc4a1ap | Slc6a21   | Slc9b2   |
| Slc35d1   | Slc39a12   | Slc4a2   | Slc6a3    | Slc9c1   |
| Slc35d2   | Slc39a13   | Slc4a3   | Slc6a4    | Slco1a1  |
| Slc35d3   | Slc39a14   | Slc4a4   | Slc6a5    | Slco1a4  |
| Slc35e1   | Slc39a2    | Slc4a5   | Slc6a6    | Slco1a5  |
| Slc35e2   | Slc39a3    | Slc4a7   | Slc6a7    | Slco1a6  |
| Slc35e3   | Slc39a4    | Slc4a8   | Slc6a8    | Slco1b2  |
| Slc35e4   | Slc39a5    | Slc4a9   | Slc6a9    | Slco1c1  |
| Slc35f1   | Slc39a6    | Slc50a1  | Slc7a1    | Slco2a1  |
| Slc35f2   | Slc39a7    | Slc51a   | Slc7a10   | Slco2b1  |
| Slc35f3   | Slc39a8    | Slc51b   | Slc7a11   | Slco3a1  |
| Slc35f4   | Slc39a9    | Slc52a2  | Slc7a12   | Slco4a1  |
| Slc35f5   | Slc3a1     | Slc52a3  | Slc7a13   | Slco4c1  |
| Slc35f6   | Slc3a2     | Slc5a1   | Slc7a14   | Slco5a1  |
| Slc35g1   | Slc40a1    | Slc5a10  | Slc7a15   | Slco6b1  |
| Slc35g2   | Slc41a1    | Slc5a11  | Slc7a2    | Slco6c1  |
| Slc35g3   | Slc41a2    | Slc5a12  | Slc7a3    | Slco6d1  |
| Slc36a1   | Slc41a3    | Slc5a2   | Slc7a4    |          |
| Slc36a1os | Slc43a1    | Slc5a3   | Slc7a5    |          |
| Slc36a2   | Slc43a2    | Slc5a4a  | Slc7a6    |          |
| Slc36a3   | Slc43a3    | Slc5a4b  | Slc7a6os  |          |
| Slc36a4   | Slc44a1    | Slc5a5   | Slc7a7    |          |
| Slc37a1   | Slc44a2    | Slc5a6   | Slc7a8    |          |

**Supplementary Data 2 HIF1-driven genes in T cells – genes sig ↑ in PHD KO vs PHD WT T cells AND sig ↓ in HIF1 KO vs HIF WT T cells (adjusted  $p < 0.05$ )**

| Gene     | WT vs PHD KO (GSE85131) |              | WT vs HIF 1 KO (GSE29765) |              |
|----------|-------------------------|--------------|---------------------------|--------------|
|          | log2 FC                 | adjusted $p$ | log2 FC                   | adjusted $p$ |
| Adm      | -2.546121               | 0.007924888  | 3.12194                   | 0.0102       |
| Ak4      | -1.889304               | 0.03409644   | 5.425637                  | 1.45E-08     |
| Aldoa    | -1.120577               | 0.001869517  | 1.726133                  | 1.03E-05     |
| Ankrd37  | -1.569994               | 0.03531962   | 5.4514                    | 2.44E-07     |
| Anxa2    | -2.282505               | 0.002006899  | 1.92107                   | 1.22E-05     |
| Anxa4    | -2.676462               | 0.000389229  | 0.7439367                 | 0.00254      |
| Arhgdig  | -2.939961               | 0.01362047   | 0.9907433                 | 0.000249     |
| Arl6ip5  | -0.5176526              | 0.04086054   | 0.3694333                 | 0.0197       |
| Atg9b    | -1.305052               | 0.03531962   | 0.9797667                 | 0.000519     |
| Basp1    | -2.522154               | 0.04120269   | 0.9180667                 | 0.0025       |
| Bend5    | -2.498746               | 0.01618295   | 3.501797                  | 1.21E-06     |
| Bhlhe40  | -2.411854               | 0.03742782   | 1.365967                  | 2.99E-05     |
| Bnip3    | -3.053233               | 0.000634716  | 5.448083                  | 2.44E-07     |
| Bnip3l   | -1.628323               | 0.01016226   | 1.60777                   | 3.24E-05     |
| Bsg      | -1.679345               | 0.001869517  | 1.578307                  | 9.69E-06     |
| Casp6    | -2.026736               | 0.008188236  | 0.5074533                 | 0.00545      |
| Ccdc115  | -0.986874               | 0.02334512   | 0.84104                   | 0.0025       |
| Cd82     | -0.9546427              | 0.02270512   | 0.3532333                 | 0.0206       |
| Cdkn1a   | -2.602944               | 0.008798899  | 1.527493                  | 0.00168      |
| Cflar    | -1.028831               | 0.03903261   | 0.6648467                 | 0.0142       |
| Clcn3    | -1.371524               | 0.01656015   | 1.796747                  | 1.42E-05     |
| Clybl    | -1.641156               | 0.01435681   | 2.821843                  | 1.55E-06     |
| Cnot7    | -0.5462343              | 0.03253053   | 0.4298833                 | 0.0337       |
| Cysltr2  | -3.098109               | 0.003217063  | 0.5772233                 | 0.0304       |
| Dnajc21  | -0.8489705              | 0.01895011   | 0.4185967                 | 0.0117       |
| Egln1    | -1.321645               | 0.01321657   | 2.560813                  | 2.49E-06     |
| Egln3    | -2.864769               | 0.004336541  | 2.348133                  | 0.000108     |
| Eif4ebp1 | -1.474452               | 0.02403916   | 0.58393                   | 0.0252       |
| Ero1l    | -2.322111               | 0.00221171   | 2.095583                  | 7.55E-05     |
| Espn     | -1.122276               | 0.01652142   | 1.378443                  | 0.0137       |
| Exoc2    | -1.114776               | 0.03903261   | 0.4438                    | 0.0462       |
| Fam162a  | -1.76144                | 0.01866003   | 1.626167                  | 4.81E-06     |
| Fam57a   | -2.34598                | 0.04001082   | 0.8791733                 | 0.00179      |
| Fscn1    | -1.418827               | 0.01070897   | 1.9271                    | 0.00221      |
| Gapdh    | -1.267996               | 0.006960698  | 0.6893                    | 0.000838     |
| Gata3    | -2.158387               | 0.002293318  | 0.6264567                 | 0.0177       |
| Gpil     | -0.9910033              | 0.02270512   | 1.62034                   | 6.17E-06     |

|                 |            |             |           |          |
|-----------------|------------|-------------|-----------|----------|
| <b>Gtf2e2</b>   | -1.06866   | 0.0288444   | 0.7408933 | 0.00515  |
| <b>Hes6</b>     | -0.6589254 | 0.03992262  | 1.002093  | 0.000859 |
| <b>Hfe</b>      | -1.77452   | 0.01941582  | 1.38228   | 0.00172  |
| <b>Higd1a</b>   | -2.001226  | 0.03680992  | 1.1232    | 6.33E-05 |
| <b>Hilpda</b>   | -3.157958  | 0.008762919 | 2.75782   | 2.42E-05 |
| <b>Hk2</b>      | -2.108636  | 0.02352318  | 1.86932   | 0.000261 |
| <b>Id2</b>      | -1.795515  | 0.03798084  | 0.3579667 | 0.0359   |
| <b>Ier3</b>     | -3.735563  | 0.006065698 | 1.900093  | 9.69E-06 |
| <b>Il10ra</b>   | -1.680866  | 0.04986422  | 0.9049667 | 0.00226  |
| <b>Itga7</b>    | -2.825229  | 0.04122895  | 4.36966   | 4.51E-06 |
| <b>Jmjd6</b>    | -1.418683  | 0.005851341 | 2.029273  | 1.74E-06 |
| <b>Kcnk7</b>    | -2.131209  | 0.02248697  | 1.429847  | 6.27E-05 |
| <b>Kctd14</b>   | -1.085374  | 0.02333753  | 0.3458133 | 0.0318   |
| <b>Klk8</b>     | -1.126952  | 0.02890286  | 0.9410067 | 0.000807 |
| <b>Ldha</b>     | -0.971314  | 0.008058179 | 0.5876333 | 0.00172  |
| <b>Lgals3</b>   | -2.446662  | 0.001790329 | 0.5862333 | 0.00527  |
| <b>Lgals7</b>   | -2.146141  | 0.00999231  | 1.284053  | 2.55E-05 |
| <b>Map2k1</b>   | -0.9446497 | 0.009473778 | 1.22525   | 0.000221 |
| <b>Mboat2</b>   | -2.913038  | 0.01648667  | 3.057593  | 1.84E-06 |
| <b>Mgarp</b>    | -4.287145  | 0.00113808  | 5.92323   | 5.94E-07 |
| <b>Mt1</b>      | -6.238007  | 0.00106782  | 3.816203  | 1.97E-06 |
| <b>Mxi1</b>     | -1.981789  | 0.02860696  | 0.88402   | 0.00117  |
| <b>Ndrg1</b>    | -1.542519  | 0.02011137  | 2.41606   | 0.000284 |
| <b>Nfil3</b>    | -2.494121  | 0.002943253 | 0.98991   | 0.00192  |
| <b>Npc2</b>     | -0.684478  | 0.0288444   | 0.5924367 | 0.01     |
| <b>P4ha2</b>    | -4.49362   | 0.003413915 | 4.705813  | 7.67E-07 |
| <b>Pafah1b3</b> | -2.07933   | 0.002942767 | 1.27817   | 2.56E-05 |
| <b>Pdxp</b>     | -1.409388  | 0.04376749  | 2.008313  | 6.48E-06 |
| <b>Pgk1</b>     | -1.411721  | 0.000348914 | 0.9841333 | 0.000134 |
| <b>Pgm2</b>     | -1.616367  | 0.01941582  | 2.98594   | 9.97E-07 |
| <b>Pla2g12a</b> | -1.613231  | 0.0167328   | 0.6175733 | 0.00699  |
| <b>Plekha2</b>  | -1.157862  | 0.01586774  | 0.5278367 | 0.0154   |
| <b>Plod2</b>    | -2.005124  | 0.02035961  | 2.016443  | 2.56E-05 |
| <b>Plod3</b>    | -1.13711   | 0.008393207 | 0.5608333 | 0.00653  |
| <b>Ppp1r3b</b>  | -1.419394  | 0.04986422  | 2.6209    | 0.000106 |
| <b>Prdx5</b>    | -0.6216044 | 0.04399256  | 0.47666   | 0.0131   |
| <b>Preli1</b>   | -0.6593593 | 0.002942767 | 0.8742    | 0.000185 |
| <b>Preli2</b>   | -2.23291   | 0.009560788 | 2.200853  | 1.55E-06 |
| <b>Prkcdbp</b>  | -3.930553  | 0.002571161 | 1.334133  | 0.00181  |
| <b>Pygl</b>     | -2.393317  | 0.01147757  | 3.225617  | 5.23E-05 |
| <b>R3hdm1</b>   | -0.7241527 | 0.03798329  | 0.8591667 | 0.00138  |
| <b>Rab33a</b>   | -3.272228  | 0.003413915 | 3.181063  | 4.49E-05 |

|                 |            |             |           |          |
|-----------------|------------|-------------|-----------|----------|
| <b>Rcor2</b>    | -2.149705  | 0.01312204  | 0.8362167 | 0.0186   |
| <b>Rnf126</b>   | -1.152552  | 0.01106983  | 1.041323  | 0.000194 |
| <b>Rnf208</b>   | -1.837556  | 0.02164251  | 0.5452167 | 0.00641  |
| <b>Sap30</b>    | -1.66957   | 0.004884304 | 1.023367  | 0.000918 |
| <b>Sdc4</b>     | -2.477841  | 0.04334791  | 3.80822   | 6.80E-06 |
| <b>Selenbp1</b> | -3.411241  | 0.003062118 | 5.339177  | 2.49E-06 |
| <b>Selp</b>     | -3.176499  | 0.005393006 | 0.8426067 | 0.00769  |
| <b>Slc16a3</b>  | -2.54334   | 0.005213429 | 3.239053  | 1.40E-05 |
| <b>Slc2a3</b>   | -3.904958  | 0.03024235  | 4.698387  | 6.67E-07 |
| <b>Slc6a6</b>   | -0.6341538 | 0.004714412 | 0.3532667 | 0.0357   |
| <b>Smtnl2</b>   | -3.354     | 0.00957543  | 3.015877  | 3.24E-05 |
| <b>Spsb1</b>    | -2.956118  | 0.01987694  | 0.3806633 | 0.0331   |
| <b>St3gal1</b>  | -1.233001  | 0.02620593  | 0.36014   | 0.0196   |
| <b>Stat5a</b>   | -1.22865   | 0.04244288  | 0.8156233 | 0.00185  |
| <b>Stc2</b>     | -2.925523  | 0.008188236 | 0.38238   | 0.0306   |
| <b>Syce2</b>    | -1.45646   | 0.009473778 | 1.17723   | 3.06E-05 |
| <b>Tex264</b>   | -0.5523263 | 0.04738994  | 0.46934   | 0.00701  |
| <b>Tgm2</b>     | -3.012663  | 0.01941582  | 0.81274   | 0.00579  |
| <b>Tmem115</b>  | -0.6638337 | 0.02391275  | 0.32676   | 0.031    |
| <b>Tmem45a</b>  | -1.966615  | 0.006960698 | 0.8382767 | 0.0162   |
| <b>Tmem74b</b>  | -2.039036  | 0.03085073  | 0.4033033 | 0.0468   |
| <b>Tpi1</b>     | -1.38717   | 0.005393006 | 2.208067  | 1.02E-06 |
| <b>Tubb6</b>    | -1.359832  | 0.03742782  | 0.9221367 | 0.000221 |
| <b>Upp1</b>     | -3.950855  | 0.005393006 | 0.55717   | 0.0167   |
| <b>Vdac1</b>    | -0.9655575 | 0.001790329 | 0.7574333 | 0.00141  |
| <b>Vegfa</b>    | -2.144259  | 0.03903261  | 2.48201   | 5.23E-05 |
| <b>Vhl</b>      | -1.206885  | 0.014941    | 0.95558   | 0.00227  |
| <b>Vldlr</b>    | -2.827102  | 0.005458818 | 4.121637  | 7.85E-07 |
| <b>Xpnpep2</b>  | -1.915553  | 0.03516309  | 0.3893867 | 0.0207   |

**Supplementary Data 3 HIF1 metabolic gene signature (adjusted  $p < 0.05$ )**

| Gene     | WT vs PHD KO (GSE85131) |              | WT vs HIF 1 KO (GSE29765) |              |
|----------|-------------------------|--------------|---------------------------|--------------|
|          | log2 FC                 | adjusted $p$ | log2 FC                   | adjusted $p$ |
| Ak4      | -1.889304               | 0.03409644   | 5.425637                  | 1.45E-08     |
| Aldoa    | -1.120577               | 0.00186952   | 1.726133                  | 1.03E-05     |
| Gapdh    | -1.267996               | 0.0069607    | 0.6893                    | 0.000838     |
| Gpi1     | -0.991003               | 0.02270512   | 1.62034                   | 6.17E-06     |
| Hk2      | -2.108636               | 0.02352318   | 1.86932                   | 0.000261     |
| Ldha     | -0.971314               | 0.00805818   | 0.5876333                 | 0.00172      |
| Mboat2   | -2.913038               | 0.01648667   | 3.057593                  | 1.84E-06     |
| P4ha2    | -4.49362                | 0.00341392   | 4.705813                  | 7.67E-07     |
| Pafah1b3 | -2.07933                | 0.00294277   | 1.27817                   | 2.56E-05     |
| Pdpx     | -1.409388               | 0.04376749   | 2.008313                  | 6.48E-06     |
| Pgk1     | -1.411721               | 0.00034891   | 0.9841333                 | 0.000134     |
| Pgm2     | -1.616367               | 0.01941582   | 2.98594                   | 9.97E-07     |
| Pla2g12a | -1.613231               | 0.0167328    | 0.6175733                 | 0.00699      |
| Plod2    | -2.005124               | 0.02035961   | 2.016443                  | 2.56E-05     |
| Plod3    | -1.13711                | 0.00839321   | 0.5608333                 | 0.00653      |
| Pygl     | -2.393317               | 0.01147757   | 3.225617                  | 5.23E-05     |
| Slc16a3  | -2.54334                | 0.00521343   | 3.239053                  | 1.40E-05     |
| Slc2a3   | -3.904958               | 0.03024235   | 4.698387                  | 6.67E-07     |
| Slc6a6   | -0.634153               | 0.00471441   | 0.3532667                 | 0.0357       |
| St3gal1  | -1.233001               | 0.02620593   | 0.36014                   | 0.0196       |
| Tpi1     | -1.38717                | 0.00539301   | 2.208067                  | 1.02E-06     |
| Upp1     | -3.950855               | 0.00539301   | 0.55717                   | 0.0167       |

## Supplementary Data 4 Peptide sequence for vectors

### 1. Peptide sequence for vector encoding mouse PDXP

MNPAISVALLLSVLQVSRGQKVTSLTACLVNQNLRLDCRHENNTKDNSIQHEFSLTREKR  
 KHVLSGTLGIPEHTYRSRVTLASNQPYIKVLTLANFTTKDEGDYFCELRVSGANPMSSNK  
 SVYRDKLVKCGGISLLVQNTSWMLLLLLLSLLQALDFISLRAKRGSGATNFSLLKQAGDV  
 EENPGPMARCELRGAALRDVLGQAQGVLFDCDGVLWNGERIVPGAPELLQRLARAGK  
 NTLFVSNNSRRARPELALRFARLGFAGLRAEQLFSSALCAARLLRQRLSGPPDASGAVFVL  
 GGEGLRaelRAAGLRLAGDPGEDPRVRAVLVGYDEQFSFSLTEACAHLRDPDCLLVAT  
 DRDPWHPLSDGSRTPGTGSLA**KK**VETASGRQALVVGKPSYMFQCITEDFSVDPARTLMV  
 GDRLETDILFGHRCGMTTVLTLTGVSLEEAQAYLTAGQRDLVPHYYVESIADLMEGLED

| Protein Name                                              | NCBI Reference Sequence                                                 |
|-----------------------------------------------------------|-------------------------------------------------------------------------|
| Thy-1.1                                                   | AAR17087.1                                                              |
| Furin cleavage site                                       | RAKR (cleavage after R)                                                 |
| Picornavirus 2A self-cleaving sequence                    | GSGATNFSLLKQAGDVEENPGP<br>(cleavage occurs between G and P)             |
| PDXP                                                      | NP_064667.2                                                             |
| <b>KK</b> Alanine residues substituted to lysine residues | Decreased affinity to pyridoxal phosphate( <i>Kestler et al. 2014</i> ) |

### 2. Peptide sequence for vector encoding mouse PDXK

MNPAISVALLLSVLQVSRGQKVTSLTACLVNQNLRLDCRHENNTKDNSIQHEFSL  
 TREKRKHVLSGTLGIPEHTYRSRVTLASNQPYIKVLTLANFTTKDEGDYFCELRVSG  
 ANPMSSNKSVYRDKLVKCGGISLLVQNTSWMLLLLLLSLLQALDFISLRAKRG  
 SGATNFSLLKQAGDVEENPGPMEGECRVLSIQSHVVRGYVGNRAAMFPLQVLGFEVDAVNS  
 VQFSNHTGYAHWKGQVLKSQELHELYEGLKVNDVNKYDYVLTGYTRDKSFLAMVVDIVRELKQ  
 NSRLVYVCDPVMGDKWNGEGSMYVPQDLLPVYRDKVVPVADHITPNQFEAELLSGRKIH  
 SQEEAFVMDMLHCMGPDVVITSSDLSSQGSYLIALGSQRMKPDGSTVTQRIRMEMRKVE  
 TIVFVGTGDLFAAMLLAWTHKHPDNLKVACEKTVSAMQHVLQRTIRCAKAEAGEGQKPS  
 PAQLELRMVQSKRDIEDPEIVVQATVI

| Protein Name                                       | NCBI Reference Sequence                                            |
|----------------------------------------------------|--------------------------------------------------------------------|
| Thy-1.1                                            | AAR17087.1                                                         |
| Furin cleavage site                                | RAKR (cleavage after R)                                            |
| Picornavirus 2A self-cleaving sequence             | GSGATNFSLLKQAGDVEENPGP<br>(cleavage occurs between G and P)        |
| PDXK                                               | NP_742146.1                                                        |
| <b>T</b> Alanine residues substituted to threonine | decreased pyridoxal kinase activity ( <i>Chelban et al. 2019</i> ) |
